# Supplementary material for: Smart gold nanosensor for easy sensing of lead and copper ions in solution and using paper strips
Source: Royal Society of Chemistry journal article supplement (doi:10.1039/c5ra14886c), 2015-01-01
Supplement: c5ra14886c1.pdf [file c5ra14886c1.pdf]

## Supporting figures/tables

Figure S1

(a)

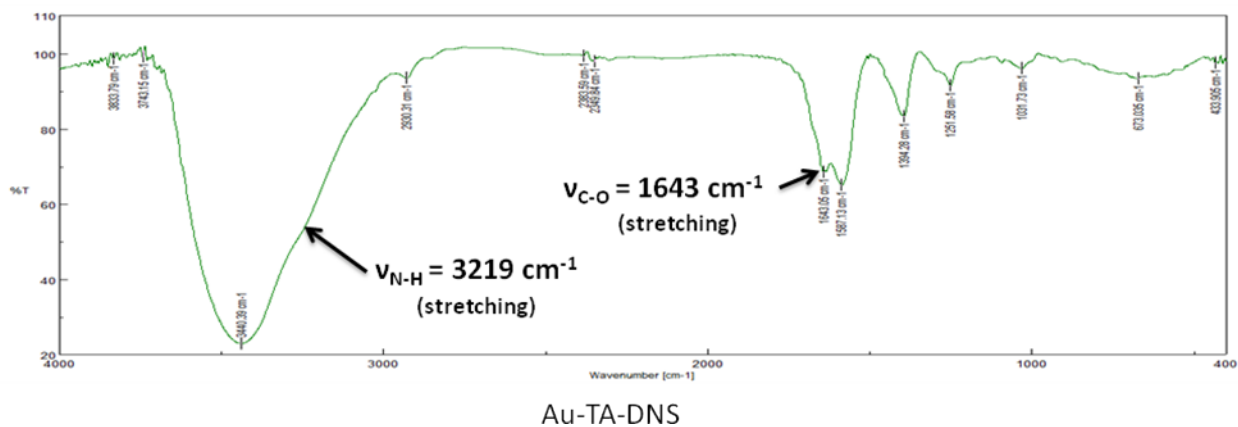

(b)

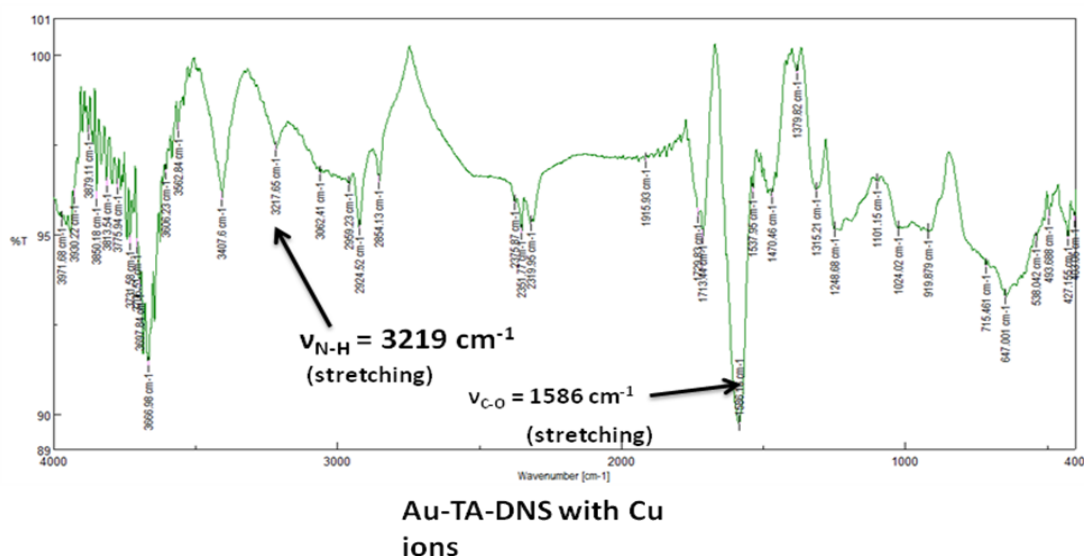

**Fig. S1** (a) FTIR spectrum of the complete gold nanosensor, Au-TA-DNS; peaks at  $\nu_{\text{NH}} = 3219 \text{ cm}^{-1}$ ,  $\nu_{\text{CO}} = 1643 \text{ cm}^{-1}$  corresponds to the stretching vibration of –NH and –C=O respectively. (b) FTIR spectrum of metal bound Au-TA-DNS, peaks at  $\nu_{\text{NH}}$  at  $3219 \text{ cm}^{-1}$  and the red shift of the carbonyl  $\nu_{\text{CO}}$  to  $1586 \text{ cm}^{-1}$  indicate that the carbonyl O-atom and hydrazine N-atom are the coordination sites.

Figure\_S2

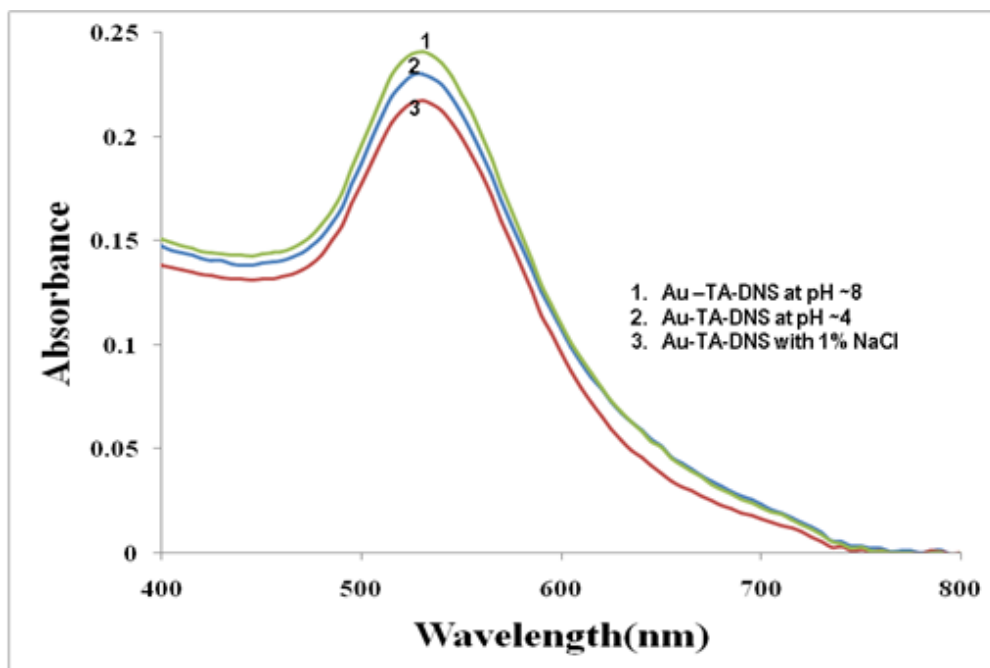

Fig S2: UV-vis spectra of gold nanosensor Au-TA-DNS at pH~8, pH~4 and 1% NaCl showing stability at various conditions.

Figure\_S3

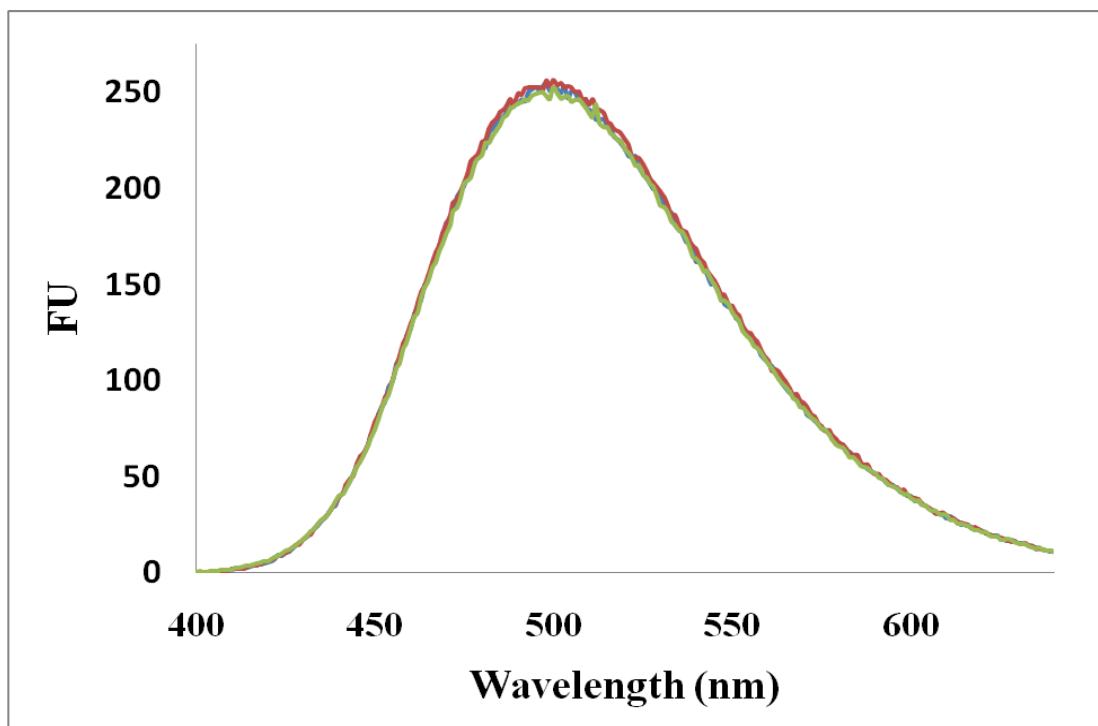

**Fig S3** Fluorescence spectrum of dansylhydrazine in presence of lead and copper ions. Dansylhydrazine alone did not show any change in fluorescence intensity when metal ions are added.

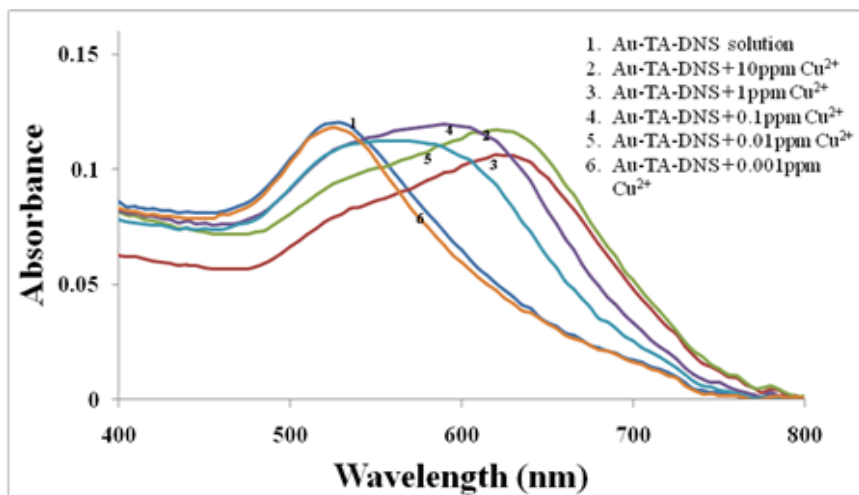

Figure S4: UV-Vis spectra showing Au-TA-DNS with various concentrations of Cu<sup>2+</sup> ions.

**Figure\_S5**

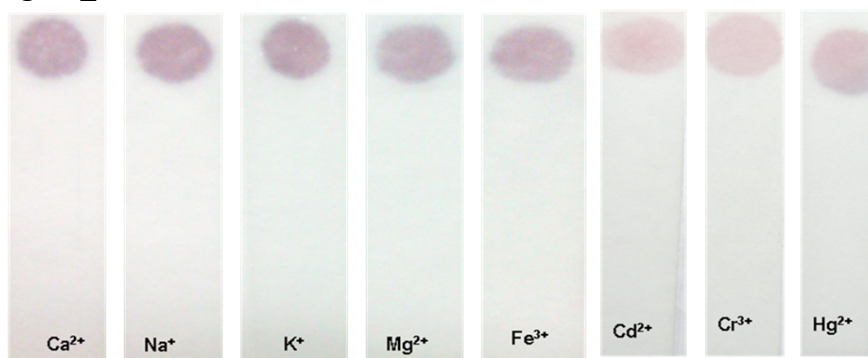

**Figure S5: Image showing straight paper strips assay with Au-TA-DNS and 10ppm of various metal ions. No bluish black color formation was observed with these metal ions indicating the specific selectivity towards Pb(II) and Cu(II).**

**Table S1**

| CONSTRUCT   | Citrate-AuNP | Au-TA  | Au-TA-DNS | Au-TA-DNS with Lead(II) ion | Au-TA-DNS with Copper (II) ion |
|-------------|--------------|--------|-----------|-----------------------------|--------------------------------|
| SIZE (nm)   | 44±0.7       | 56±3.5 | 71±1.2    | 128±4.4                     | 114±3.5                        |
| CHARGE (mV) | -24.4        | -31.3  | -38.2     | -37.0                       | -28.4                          |

**Table S1: Hydrodynamic size and surface charge measurements at different chemical modification steps and after addition of metal ions Pb<sup>2+</sup> and Cu<sup>2+</sup> .**
